# Supplementary material for: The bonding situation in heteromultimetallic carbonyl complexes
Source: Royal Society of Chemistry journal article supplement (doi:10.1039/d0dt02916e), 2020-01-01
Supplement: d0dt02916e1.pdf [file d0dt02916e1.pdf]

## BONDING SITUATION IN HETEROMULTIMETALLIC CARBONYL COMPLEXES

Alexandre O. Ortolan,<sup>a</sup> Giovanni F. Caramori,<sup>a,\*</sup> Renato L. T. Parreira,<sup>b</sup> Renato P. Orenha,<sup>b\*</sup> Alvaro Muñoz–Castro,<sup>c</sup> and Gernot Frenking<sup>d</sup>

<sup>a</sup> Departamento de Química, Universidade Federal de Santa Catarina, Campus Universitário Trindade, CP 476, Florianópolis, SC, 88040–900, Brazil.

<sup>b</sup> Núcleo de Pesquisa em Ciências Exatas e Tecnológicas, Universidade de Franca, Franca, SP, 14404–600, Brazil.

<sup>c</sup> Laboratorio de Química Inorgánica y Materiales Moleculares, Facultad de Ingeniería, Universidad Autónoma de Chile, Llano Subercaceaux 2801, San Miguel, Santiago, Chile.

<sup>d</sup> Fachbereich Chemie, Philipps–Universität Marburg, Hans–Meerwein–Strasse, D–35032 Marburg, Germany.

\* Giovanni F. Caramori: [giovanni.caramori@ufsc.br](mailto:giovanni.caramori@ufsc.br)

### SUPPORTING INFORMATION

|                                         |               |
|-----------------------------------------|---------------|
| <b>1 QTAIM Analysis</b>                 | <b>S2–S3</b>  |
| <b>2 ETS–NOCV Density Flow Channels</b> | <b>S4–S5</b>  |
| <b>3 KS–MO Diagrams</b>                 | <b>S6–S7</b>  |
| <b>4 XYZ Cartesian Coordinates</b>      | <b>S8–S21</b> |

## 1 QTAIM Analysis

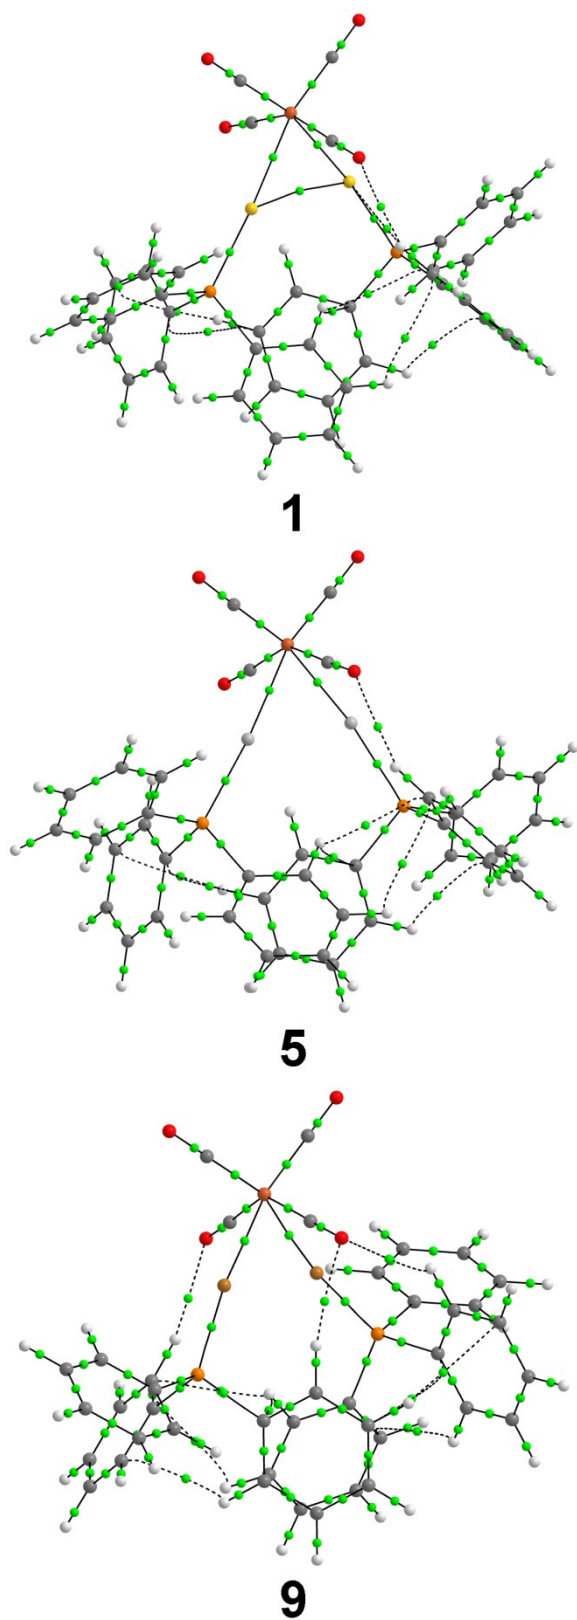

**Fig. S1** Topological maps containing bond critical points (green dots) and bond paths (black lines) to selected complexes (**1**, **5** and **9**). Color code: H = white; C = gray; O = red; P = orange; Fe = brown; Cu = copper; Ag = silver; Au = yellow.

**Table S1.** Electron density,  $\rho_b$ , Laplacian of  $\rho_b$ ,  $\nabla^2\rho_b$ , and  $-G_b/V_b$ , at M–M BCPs, and M–M fuzzy bond orders (FBOs) in the complexes **1**, **3**, **5**, **7**, **9** and **10**. The values of all the parameters are in a.u.

| Complex   | $\rho_b$ | $\nabla^2\rho_b$ | $-G_b/V_b$ | FBO   |
|-----------|----------|------------------|------------|-------|
| <b>1</b>  | 0.039    | 0.082            | 0.828      | 0.592 |
| <b>3</b>  | 0.040    | 0.080            | 0.820      | 0.618 |
| <b>5</b>  | –        | –                | –          | 0.489 |
| <b>7</b>  | –        | –                | –          | 0.522 |
| <b>9</b>  | –        | –                | –          | 0.446 |
| <b>10</b> | –        | –                | –          | 0.471 |

## 2 ETS–NOCV Density Flow Channels

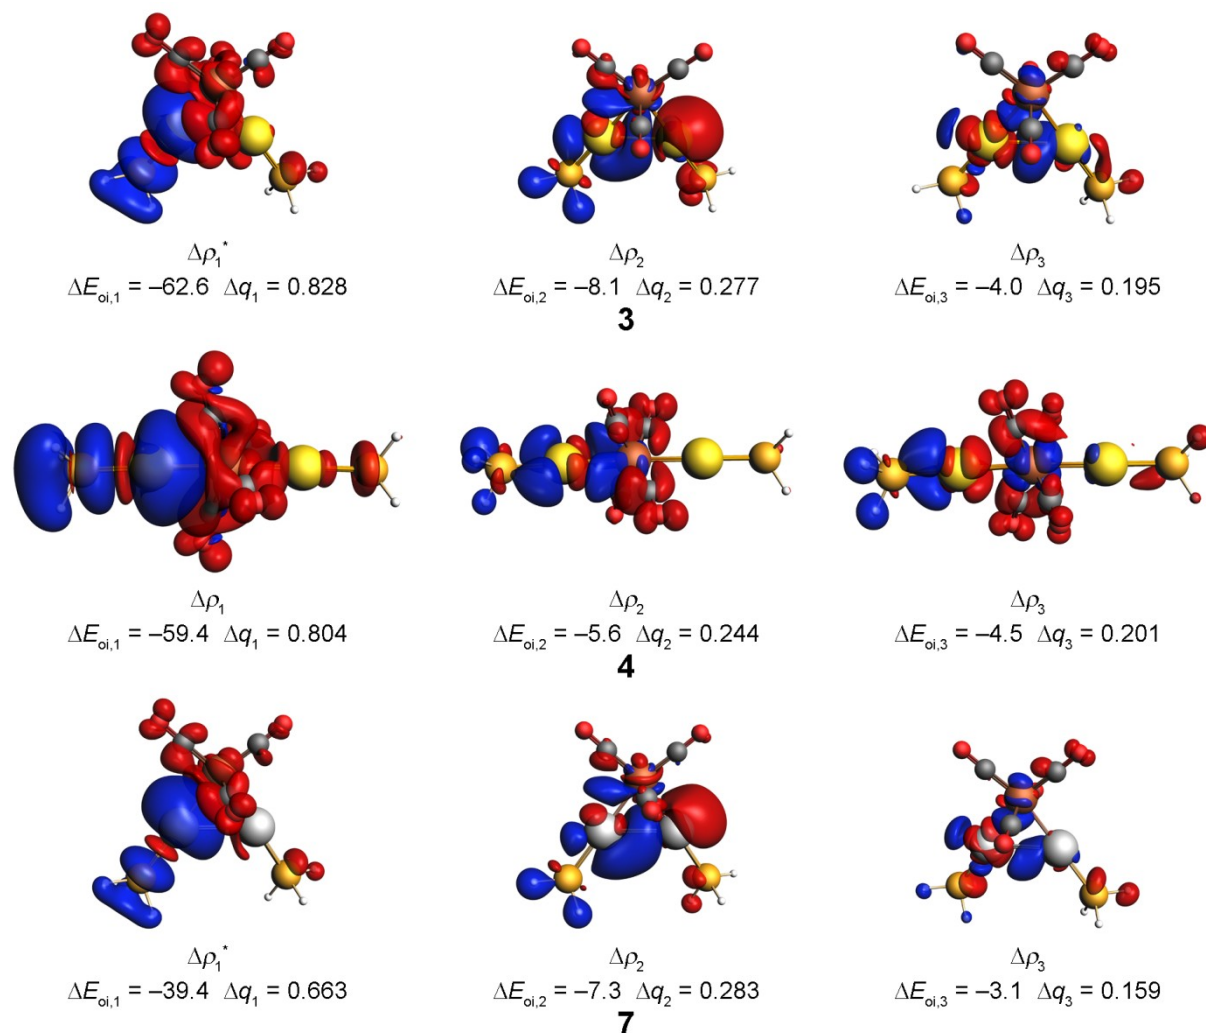

**Fig. S2** Selected density flow channels ( $\Delta\rho_i$ ), describing the orbital interactions between the fragments  $[M(\text{PH}_3)]^+$  and  $[M(\text{PH}_3)\text{Fe}(\text{CO})_4]^-$  ( $M = \text{Au}(\text{I})$  and  $\text{Ag}(\text{I})$ ) in the complexes **3**, **4** and **7**). The values of the  $\Delta E_{oi}$  (kcal mol<sup>-1</sup>) energy and  $\Delta q_i$  charge transfer (a.u.) to each ( $\Delta\rho_i$ ) channel are shown. Red and blue surfaces indicate the electron density outflow and inflow, respectively. The isovalue used to represent these surfaces is equal to 0.0003 (\* 0.0008) a.u.

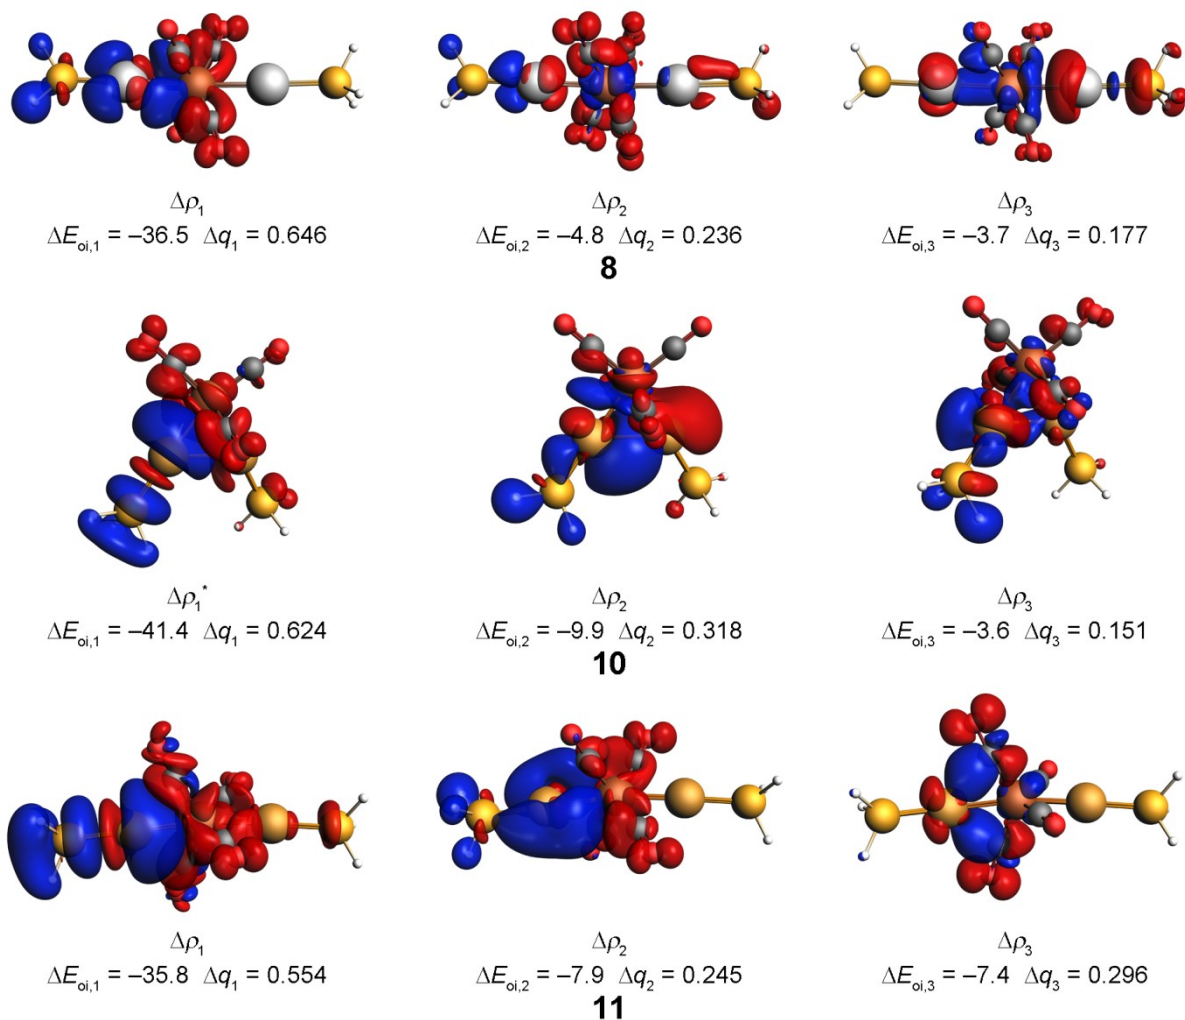

**Fig. S3** Selected density flow channels ( $\Delta\rho_i$ ), describing the orbital interactions between the fragments  $[M(\text{PH}_3)]^+$  and  $[M(\text{PH}_3)\text{Fe}(\text{CO})_4]^-$  ( $M = \text{Ag}(\text{I})$  and  $\text{Cu}(\text{I})$ ) in the complexes **8**, **10** and **11**). The values of the  $\Delta E_{oi,i}$  (kcal mol<sup>-1</sup>) energy and  $\Delta q_i$  charge transfer (a.u.) to each ( $\Delta\rho_i$ ) channel are shown. Red and blue surfaces indicate the electron density outflow and inflow, respectively. The isovalue used to represent these surfaces is equal to 0.0003 (\* 0.0008) a.u.

### 3. KS–MO Diagrams

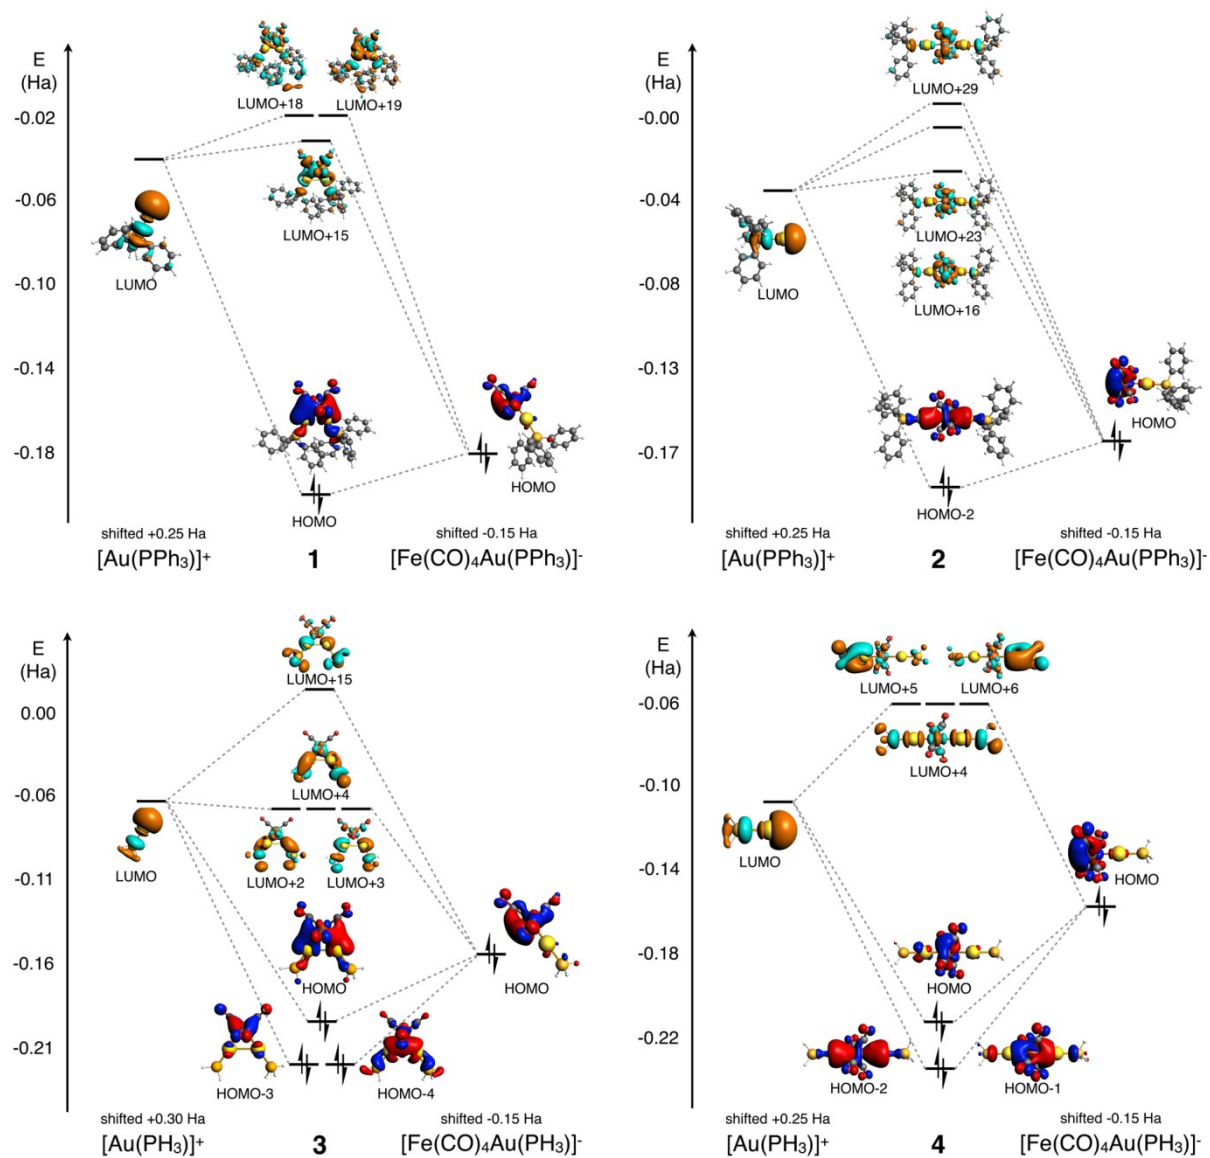

**Fig. S4** Schematic orbital–interaction diagram for complexes **1**, **2**, **3** and **4**, based on quantitative Kohn–Sham MO analyses. MOs shown in blue/red indicates double occupied whereas in cyan/orange empty virtual orbitals.

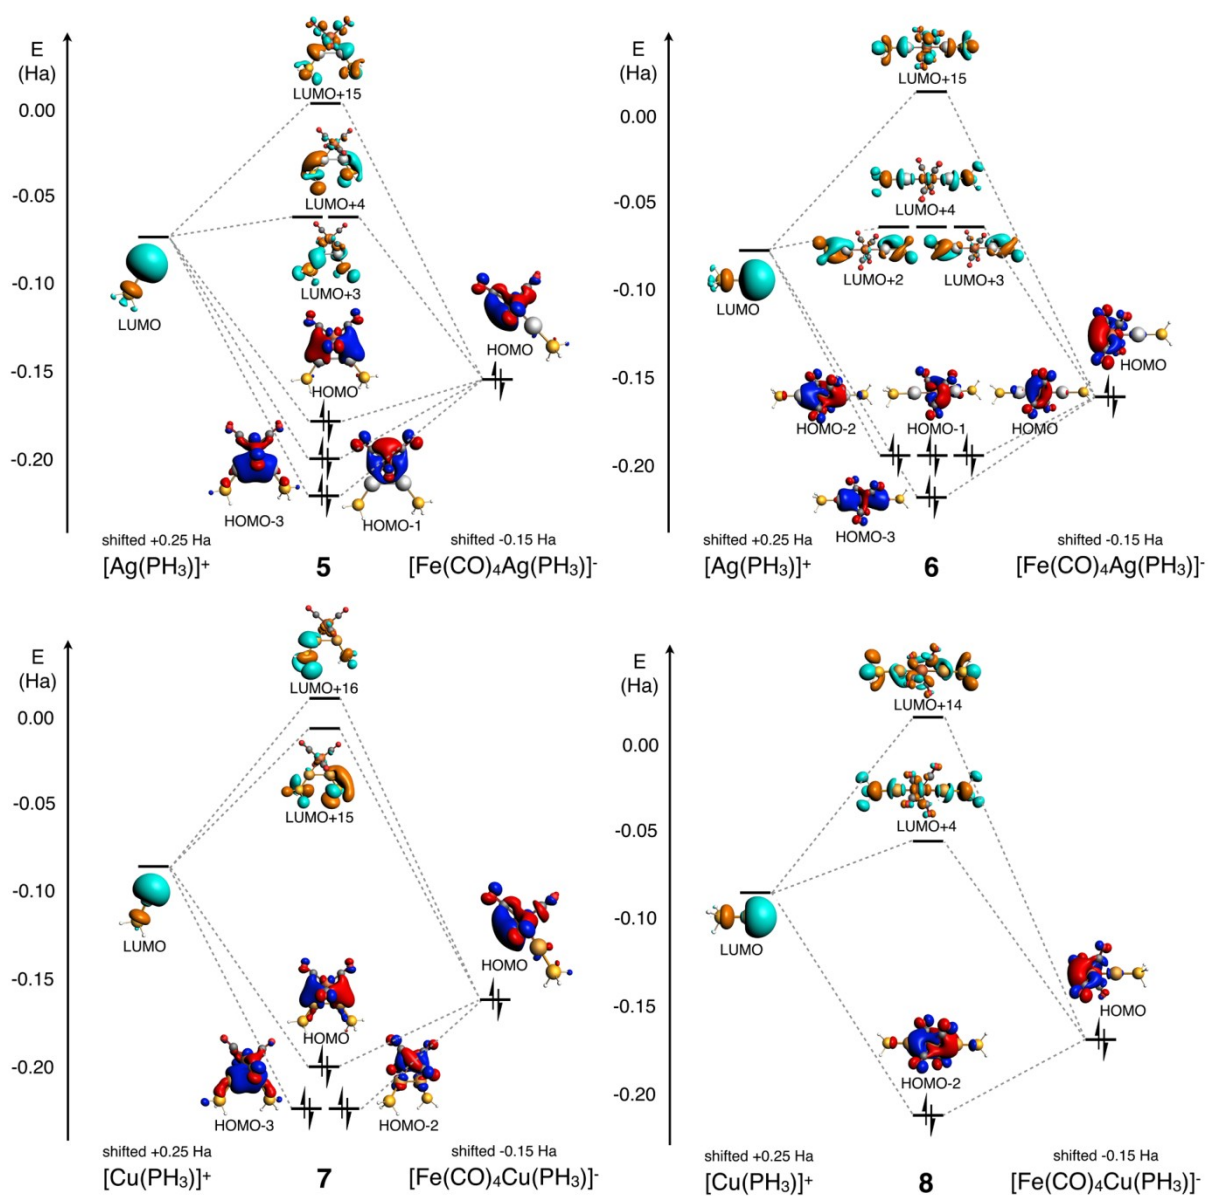

**Fig. S5** Schematic orbital–interaction diagram for complexes **5**, **6**, **7** and **8**, based on quantitative Kohn–Sham MO analyses. MOs shown in blue/red indicates double occupied whereas in cyan/orange empty virtual orbitals.

## 4. XYZ Cartesian Coordinates

| Complex | 1         |           |           |
|---------|-----------|-----------|-----------|
| Atom    | X         | Y         | Z         |
| Au      | 12.876316 | -3.577879 | 5.215368  |
| Au      | 15.307734 | -2.833860 | 6.658846  |
| Fe      | 13.603400 | -1.182571 | 5.699914  |
| P       | 12.525727 | -5.803452 | 4.818543  |
| P       | 16.857438 | -4.196523 | 7.636461  |
| C       | 12.178487 | -0.489329 | 4.902153  |
| O       | 11.251457 | -0.019506 | 4.382338  |
| C       | 14.476653 | 0.268610  | 6.226753  |
| O       | 15.037933 | 1.227820  | 6.566285  |
| C       | 14.592492 | -1.595288 | 4.270451  |
| O       | 15.235178 | -1.826573 | 3.321990  |
| C       | 12.887370 | -1.659994 | 7.266659  |
| O       | 12.409205 | -1.930396 | 8.298241  |
| C       | 18.436575 | -3.369177 | 8.022017  |
| C       | 18.990146 | -2.548512 | 7.026897  |
| C       | 20.211487 | -1.915784 | 7.244266  |
| C       | 20.880570 | -2.083492 | 8.460449  |
| C       | 20.324673 | -2.886076 | 9.457750  |
| C       | 19.104398 | -3.529916 | 9.242016  |
| C       | 17.362893 | -5.641827 | 6.644969  |
| C       | 18.611810 | -6.261499 | 6.802333  |
| C       | 18.931658 | -7.381941 | 6.035871  |
| C       | 18.014363 | -7.882650 | 5.106853  |
| C       | 16.778606 | -7.256527 | 4.936711  |
| C       | 16.456211 | -6.136565 | 5.700594  |
| C       | 16.299211 | -4.879533 | 9.233700  |
| C       | 16.760513 | -6.105472 | 9.730021  |
| C       | 16.319350 | -6.566371 | 10.970522 |
| C       | 15.412858 | -5.810577 | 11.717934 |
| C       | 14.943217 | -4.591601 | 11.220843 |
| C       | 15.382292 | -4.126862 | 9.981508  |
| C       | 13.453234 | -6.361517 | 3.347202  |
| C       | 14.508085 | -5.563449 | 2.881414  |
| C       | 15.278852 | -5.984648 | 1.798246  |
| C       | 14.997774 | -7.199619 | 1.170454  |
| C       | 13.933296 | -7.988431 | 1.616817  |
| C       | 13.157860 | -7.569922 | 2.697866  |
| C       | 10.846889 | -6.455393 | 4.538025  |
| C       | 10.098596 | -5.899350 | 3.488819  |
| C       | 8.813545  | -6.366370 | 3.225241  |
| C       | 8.258373  | -7.378039 | 4.015203  |



|         |           |           |           |
|---------|-----------|-----------|-----------|
| C       | 8.993002  | -7.919326 | 5.069715  |
| C       | 10.286369 | -7.462227 | 5.332901  |
| C       | 13.180522 | -6.802444 | 6.200891  |
| C       | 13.647247 | -8.112446 | 6.028876  |
| C       | 14.153416 | -8.822463 | 7.116704  |
| C       | 14.186898 | -8.232782 | 8.381852  |
| C       | 13.715330 | -6.931417 | 8.559931  |
| C       | 13.223407 | -6.211862 | 7.472733  |
| H       | 18.452626 | -2.402424 | 6.088468  |
| H       | 20.636342 | -1.279215 | 6.468421  |
| H       | 21.831540 | -1.579664 | 8.633176  |
| H       | 20.839376 | -3.010664 | 10.410629 |
| H       | 18.670214 | -4.152373 | 10.023509 |
| H       | 19.334833 | -5.857426 | 7.511243  |
| H       | 19.903106 | -7.861305 | 6.157742  |
| H       | 18.271440 | -8.754738 | 4.505303  |
| H       | 16.067875 | -7.628177 | 4.199607  |
| H       | 15.502575 | -5.628020 | 5.567939  |
| H       | 17.449812 | -6.707348 | 9.138776  |
| H       | 16.680008 | -7.521815 | 11.352120 |
| H       | 15.064949 | -6.175819 | 12.684295 |
| H       | 14.225774 | -4.004773 | 11.793748 |
| H       | 15.002109 | -3.187123 | 9.577589  |
| H       | 14.716403 | -4.608699 | 3.366734  |
| H       | 16.095908 | -5.357239 | 1.443778  |
| H       | 15.598841 | -7.527234 | 0.322118  |
| H       | 13.701083 | -8.928318 | 1.115674  |
| H       | 12.311794 | -8.172351 | 3.029708  |
| H       | 10.527788 | -5.100333 | 2.882973  |
| H       | 8.238944  | -5.935286 | 2.406220  |
| H       | 7.250208  | -7.738067 | 3.810756  |
| H       | 8.561469  | -8.703274 | 5.691969  |
| H       | 10.859664 | -7.889320 | 6.154009  |
| H       | 13.634347 | -8.571994 | 5.041566  |
| H       | 14.529977 | -9.835253 | 6.973254  |
| H       | 14.590802 | -8.783599 | 9.231031  |
| H       | 13.749303 | -6.466809 | 9.543697  |
| H       | 12.888041 | -5.181238 | 7.598711  |
| Complex |           | <b>2</b>  |           |
| Atom    | X         | Y         | Z         |
| Au      | 13.129864 | -3.923686 | 5.132894  |
| Au      | 14.550039 | 0.864138  | 5.998365  |
| Fe      | 13.765606 | -1.526468 | 5.664367  |
| P       | 12.590043 | -6.091465 | 4.707063  |
| P       | 15.424872 | 2.952486  | 6.226290  |
| C       | 12.338028 | -0.488414 | 5.916652  |

|   |           |           |           |
|---|-----------|-----------|-----------|
| O | 11.357373 | 0.126215  | 6.079128  |
| C | 15.548981 | -1.498568 | 5.679394  |
| O | 16.718005 | -1.552581 | 5.684285  |
| C | 13.552841 | -1.705139 | 3.900687  |
| O | 13.427164 | -1.738230 | 2.738709  |
| C | 13.574120 | -2.411960 | 7.198732  |
| O | 13.457069 | -2.937257 | 8.237259  |
| C | 14.409700 | 4.286422  | 5.511952  |
| C | 13.743077 | 4.021557  | 4.306324  |
| C | 12.978323 | 5.015902  | 3.700301  |
| C | 12.862324 | 6.273120  | 4.300244  |
| C | 13.513175 | 6.534550  | 5.507392  |
| C | 14.288852 | 5.545318  | 6.114206  |
| C | 17.046476 | 3.116851  | 5.411030  |
| C | 17.459813 | 4.314729  | 4.813097  |
| C | 18.720637 | 4.398024  | 4.221521  |
| C | 19.571845 | 3.290751  | 4.227237  |
| C | 19.158704 | 2.093724  | 4.817584  |
| C | 17.897432 | 2.001285  | 5.403185  |
| C | 15.710248 | 3.466515  | 7.950676  |
| C | 16.869365 | 4.140043  | 8.354240  |
| C | 17.021885 | 4.524048  | 9.687483  |
| C | 16.019755 | 4.243000  | 10.617514 |
| C | 14.864661 | 3.565504  | 10.217729 |
| C | 14.711660 | 3.170498  | 8.890830  |
| C | 13.419072 | -6.782469 | 3.238346  |
| C | 14.746617 | -6.398036 | 2.998033  |
| C | 15.436164 | -6.918152 | 1.904946  |
| C | 14.802613 | -7.814539 | 1.039841  |
| C | 13.477131 | -8.188644 | 1.269257  |
| C | 12.783545 | -7.676266 | 2.366790  |
| C | 10.816314 | -6.367969 | 4.396676  |
| C | 10.156387 | -5.448997 | 3.565768  |
| C | 8.807456  | -5.623689 | 3.266721  |
| C | 8.104440  | -6.703769 | 3.808165  |
| C | 8.754578  | -7.609172 | 4.648487  |
| C | 10.109453 | -7.445502 | 4.943251  |
| C | 13.029443 | -7.228488 | 6.060661  |
| C | 13.373923 | -8.566068 | 5.822156  |
| C | 13.685669 | -9.405233 | 6.891695  |
| C | 13.655080 | -8.914234 | 8.199006  |
| C | 13.318766 | -7.579598 | 8.438126  |
| C | 13.011947 | -6.734250 | 7.372954  |
| H | 13.819412 | 3.029933  | 3.857334  |
| H | 12.461623 | 4.805385  | 2.764092  |
| H | 12.254975 | 7.046776  | 3.830523  |

|                |           |            |           |
|----------------|-----------|------------|-----------|
| H              | 13.415937 | 7.511571   | 5.980942  |
| H              | 14.793714 | 5.747082   | 7.058506  |
| H              | 16.792353 | 5.176112   | 4.802834  |
| H              | 19.036842 | 5.329622   | 3.751817  |
| H              | 20.554744 | 3.357422   | 3.760948  |
| H              | 19.814194 | 1.223179   | 4.811318  |
| H              | 17.562838 | 1.059300   | 5.840452  |
| H              | 17.652518 | 4.356943   | 7.628787  |
| H              | 17.927873 | 5.043367   | 9.999379  |
| H              | 16.142447 | 4.542660   | 11.658101 |
| H              | 14.086264 | 3.333816   | 10.944263 |
| H              | 13.823144 | 2.620888   | 8.576860  |
| H              | 15.225943 | -5.679383  | 3.664693  |
| H              | 16.466084 | -6.613361  | 1.720210  |
| H              | 15.340081 | -8.212676  | 0.179235  |
| H              | 12.978506 | -8.879744  | 0.589558  |
| H              | 11.746710 | -7.962304  | 2.542170  |
| H              | 10.705062 | -4.595537  | 3.164619  |
| H              | 8.299908  | -4.908227  | 2.619961  |
| H              | 7.046156  | -6.833428  | 3.581656  |
| H              | 8.205578  | -8.446590  | 5.078931  |
| H              | 10.616201 | -8.151361  | 5.600478  |
| H              | 13.408458 | -8.945271  | 4.800964  |
| H              | 13.958648 | -10.443513 | 6.702744  |
| H              | 13.904540 | -9.570597  | 9.032511  |
| H              | 13.308300 | -7.189467  | 9.455582  |
| H              | 12.774946 | -5.684461  | 7.552746  |
| <b>Complex</b> |           | <b>3</b>   |           |
| Atom           | X         | Y          | Z         |
| Au             | 12.988983 | -3.583143  | 5.243091  |
| Au             | 15.355444 | -2.712076  | 6.709452  |
| Fe             | 13.605815 | -1.166294  | 5.712399  |
| P              | 12.428149 | -5.751211  | 4.808527  |
| P              | 16.929845 | -4.096852  | 7.614364  |
| C              | 12.190060 | -0.503722  | 4.869260  |
| O              | 11.271097 | -0.055156  | 4.321521  |
| C              | 14.433643 | 0.302723   | 6.269566  |
| O              | 14.959979 | 1.273178   | 6.625719  |
| C              | 14.618330 | -1.503740  | 4.271648  |
| O              | 15.269065 | -1.678677  | 3.322938  |
| C              | 12.802030 | -1.608931  | 7.252625  |
| O              | 12.267825 | -1.854028  | 8.256767  |
| H              | 18.279253 | -3.680983  | 7.761462  |
| H              | 17.188204 | -5.349342  | 6.995169  |
| H              | 16.737568 | -4.580779  | 8.934488  |
| H              | 12.935980 | -6.373417  | 3.639186  |

|         |           |           |          |
|---------|-----------|-----------|----------|
| H       | 11.070817 | -6.134602 | 4.648704 |
| H       | 12.796054 | -6.768188 | 5.730370 |
| Complex |           | <b>4</b>  |          |
| Atom    | X         | Y         | Z        |
| Au      | 13.125969 | -3.914148 | 5.157169 |
| Au      | 14.620264 | 0.823551  | 5.990061 |
| Fe      | 13.833856 | -1.541427 | 5.615223 |
| P       | 12.506632 | -6.063617 | 4.755364 |
| P       | 15.348073 | 2.957161  | 6.293011 |
| C       | 12.370596 | -0.534478 | 5.816670 |
| O       | 11.381422 | 0.067761  | 5.946073 |
| C       | 15.622589 | -1.575553 | 5.615223 |
| O       | 16.784337 | -1.665809 | 5.610836 |
| C       | 13.655763 | -1.715100 | 3.843022 |
| O       | 13.552388 | -1.760539 | 2.682999 |
| C       | 13.659162 | -2.337530 | 7.206028 |
| O       | 13.552984 | -2.800545 | 8.269849 |
| H       | 14.547896 | 4.034070  | 5.834663 |
| H       | 16.571796 | 3.357626  | 5.699704 |
| H       | 15.598112 | 3.445354  | 7.601245 |
| H       | 12.976274 | -6.720870 | 3.589431 |
| H       | 11.131204 | -6.385566 | 4.617640 |
| H       | 12.846915 | -7.068399 | 5.697098 |
| Complex |           | <b>5</b>  |          |
| Atom    | X         | Y         | Z        |
| Ag      | 12.777340 | -3.467317 | 5.239047 |
| Ag      | 15.292978 | -2.812319 | 6.594806 |
| Fe      | 13.648418 | -1.113741 | 5.651506 |
| P       | 12.444631 | -5.785042 | 4.840967 |
| P       | 16.867476 | -4.237154 | 7.633734 |
| C       | 12.232168 | -0.383987 | 4.882796 |
| O       | 11.313359 | 0.127483  | 4.381660 |
| C       | 14.600511 | 0.300180  | 6.119361 |
| O       | 15.211508 | 1.245286  | 6.419501 |
| C       | 14.585360 | -1.637119 | 4.228653 |
| O       | 15.199552 | -1.921581 | 3.267920 |
| C       | 12.982382 | -1.567279 | 7.243881 |
| O       | 12.529445 | -1.798501 | 8.302958 |
| C       | 18.450473 | -3.416032 | 8.021870 |
| C       | 18.992465 | -2.572076 | 7.039786 |
| C       | 20.209403 | -1.932370 | 7.262239 |
| C       | 20.885947 | -2.116228 | 8.471713 |
| C       | 20.342120 | -2.941930 | 9.456873 |
| C       | 19.126843 | -3.592720 | 9.235384 |
| C       | 17.359916 | -5.686459 | 6.641730 |
| C       | 18.605325 | -6.316811 | 6.783929 |

|   |           |           |           |
|---|-----------|-----------|-----------|
| C | 18.915597 | -7.425073 | 5.996075  |
| C | 17.992378 | -7.903767 | 5.060989  |
| C | 16.758558 | -7.269468 | 4.907667  |
| C | 16.446661 | -6.161786 | 5.693262  |
| C | 16.309145 | -4.906579 | 9.236246  |
| C | 16.747677 | -6.139905 | 9.734832  |
| C | 16.306920 | -6.585176 | 10.981196 |
| C | 15.424358 | -5.805591 | 11.732896 |
| C | 14.977855 | -4.578513 | 11.234461 |
| C | 15.415400 | -4.130361 | 9.988370  |
| C | 13.419325 | -6.300884 | 3.382603  |
| C | 14.447658 | -5.456513 | 2.939007  |
| C | 15.252251 | -5.835405 | 1.864762  |
| C | 15.030956 | -7.055136 | 1.222492  |
| C | 13.992824 | -7.890932 | 1.645658  |
| C | 13.184916 | -7.515078 | 2.718556  |
| C | 10.805809 | -6.526836 | 4.536252  |
| C | 10.046946 | -6.008896 | 3.474110  |
| C | 8.789907  | -6.536658 | 3.190797  |
| C | 8.271312  | -7.573229 | 3.973513  |
| C | 9.014917  | -8.077702 | 5.040653  |
| C | 10.280392 | -7.558816 | 5.323792  |
| C | 13.129570 | -6.757835 | 6.227772  |
| C | 13.617124 | -8.061659 | 6.064730  |
| C | 14.131214 | -8.757982 | 7.157266  |
| C | 14.152264 | -8.160809 | 8.419228  |
| C | 13.663624 | -6.864819 | 8.588868  |
| C | 13.163464 | -6.158988 | 7.495819  |
| H | 18.451173 | -2.412042 | 6.105388  |
| H | 20.623633 | -1.276944 | 6.496500  |
| H | 21.832516 | -1.605979 | 8.649417  |
| H | 20.862334 | -3.078654 | 10.405070 |
| H | 18.701472 | -4.231613 | 10.008406 |
| H | 19.333620 | -5.928223 | 7.496179  |
| H | 19.885003 | -7.911683 | 6.104774  |
| H | 18.243576 | -8.764632 | 4.441184  |
| H | 16.042534 | -7.623020 | 4.166489  |
| H | 15.493049 | -5.649958 | 5.570675  |
| H | 17.419539 | -6.758445 | 9.140469  |
| H | 16.650216 | -7.546095 | 11.365184 |
| H | 15.077351 | -6.158107 | 12.704278 |
| H | 14.279346 | -3.972835 | 11.811078 |
| H | 15.050151 | -3.182902 | 9.587824  |
| H | 14.613678 | -4.495037 | 3.428102  |
| H | 16.046171 | -5.169625 | 1.528329  |
| H | 15.657006 | -7.349491 | 0.380092  |

|         |           |           |           |
|---------|-----------|-----------|-----------|
| H       | 13.806519 | -8.834724 | 1.132632  |
| H       | 12.359154 | -8.154501 | 3.031694  |
| H       | 10.446350 | -5.192853 | 2.869874  |
| H       | 8.208652  | -6.133818 | 2.361640  |
| H       | 7.285172  | -7.981651 | 3.753409  |
| H       | 8.612094  | -8.881298 | 5.657282  |
| H       | 10.859607 | -7.958209 | 6.155040  |
| H       | 13.611961 | -8.526507 | 5.079845  |
| H       | 14.522632 | -9.766046 | 7.020725  |
| H       | 14.560280 | -8.701289 | 9.272833  |
| H       | 13.689771 | -6.394576 | 9.570172  |
| H       | 12.808865 | -5.134056 | 7.620137  |
| Complex |           | <b>6</b>  |           |
| Atom    | X         | Y         | Z         |
| Ag      | 12.611700 | -3.696991 | 4.902433  |
| Ag      | 13.990957 | 0.986447  | 6.014084  |
| Fe      | 12.918415 | -1.274514 | 5.579855  |
| P       | 12.553286 | -6.014435 | 4.499677  |
| P       | 15.238167 | 2.961139  | 6.328549  |
| C       | 11.695507 | -0.074723 | 6.062754  |
| O       | 10.813261 | 0.634801  | 6.371535  |
| C       | 14.691108 | -1.348249 | 5.396551  |
| O       | 15.851287 | -1.494007 | 5.257319  |
| C       | 12.377443 | -1.360748 | 3.883627  |
| O       | 12.016922 | -1.318911 | 2.767607  |
| C       | 12.697431 | -2.274586 | 7.034050  |
| O       | 12.554582 | -2.858979 | 8.043222  |
| C       | 14.377328 | 4.513990  | 5.912255  |
| C       | 13.474369 | 4.491631  | 4.839453  |
| C       | 12.823184 | 5.660599  | 4.450645  |
| C       | 13.059964 | 6.854284  | 5.136962  |
| C       | 13.947605 | 6.876966  | 6.214499  |
| C       | 14.606883 | 5.710539  | 6.603910  |
| C       | 16.750802 | 2.991124  | 5.308949  |
| C       | 17.309128 | 4.185980  | 4.834182  |
| C       | 18.485211 | 4.155422  | 4.084815  |
| C       | 19.106385 | 2.936286  | 3.805234  |
| C       | 18.547023 | 1.743745  | 4.269751  |
| C       | 17.368458 | 1.766773  | 5.014520  |
| C       | 15.823477 | 3.217512  | 8.036701  |
| C       | 17.131133 | 3.615589  | 8.340079  |
| C       | 17.509782 | 3.805150  | 9.670317  |
| C       | 16.588189 | 3.601837  | 10.698688 |
| C       | 15.283822 | 3.198314  | 10.398809 |
| C       | 14.904003 | 2.997062  | 9.074002  |
| C       | 13.553244 | -6.594021 | 3.088515  |

|   |           |           |           |
|---|-----------|-----------|-----------|
| C | 14.779273 | -5.953626 | 2.853228  |
| C | 15.600585 | -6.380081 | 1.811345  |
| C | 15.198588 | -7.437973 | 0.990888  |
| C | 13.972532 | -8.067700 | 1.213496  |
| C | 13.149663 | -7.650175 | 2.260892  |
| C | 10.893496 | -6.703020 | 4.190336  |
| C | 10.041146 | -5.979929 | 3.341149  |
| C | 8.767888  | -6.465527 | 3.051092  |
| C | 8.329987  | -7.665029 | 3.619667  |
| C | 9.169445  | -8.378261 | 4.477387  |
| C | 10.450309 | -7.901937 | 4.762577  |
| C | 13.196470 | -6.954188 | 5.924718  |
| C | 13.833873 | -8.194117 | 5.776784  |
| C | 14.282050 | -8.884808 | 6.902926  |
| C | 14.097614 | -8.342712 | 8.177637  |
| C | 13.471445 | -7.103187 | 8.326817  |
| C | 13.025803 | -6.405481 | 7.204728  |
| H | 13.279196 | 3.552897  | 4.317963  |
| H | 12.121021 | 5.636994  | 3.617796  |
| H | 12.544035 | 7.766153  | 4.837183  |
| H | 14.126773 | 7.805702  | 6.756286  |
| H | 15.294856 | 5.725704  | 7.448726  |
| H | 16.819785 | 5.136547  | 5.044426  |
| H | 18.914713 | 5.086333  | 3.714508  |
| H | 20.022751 | 2.915285  | 3.215608  |
| H | 19.020058 | 0.789029  | 4.042427  |
| H | 16.922759 | 0.831163  | 5.356401  |
| H | 17.851729 | 3.772008  | 7.538071  |
| H | 18.529979 | 4.110697  | 9.902364  |
| H | 16.887859 | 3.748281  | 11.736260 |
| H | 14.564807 | 3.027016  | 11.199721 |
| H | 13.892466 | 2.662171  | 8.837869  |
| H | 15.081712 | -5.116329 | 3.485049  |
| H | 16.551506 | -5.878696 | 1.632535  |
| H | 15.838110 | -7.765045 | 0.171107  |
| H | 13.653304 | -8.887372 | 0.569500  |
| H | 12.190886 | -8.138835 | 2.432484  |
| H | 10.377684 | -5.032901 | 2.915442  |
| H | 8.110848  | -5.899834 | 2.390669  |
| H | 7.329348  | -8.037901 | 3.401396  |
| H | 8.826747  | -9.308808 | 4.930055  |
| H | 11.103520 | -8.456963 | 5.435110  |
| H | 13.986694 | -8.611913 | 4.781649  |
| H | 14.780543 | -9.846995 | 6.784004  |
| H | 14.453082 | -8.882729 | 9.055256  |
| H | 13.339394 | -6.668457 | 9.317336  |

|         |  |           |           |          |
|---------|--|-----------|-----------|----------|
| H       |  | 12.558148 | -5.426502 | 7.323047 |
| Complex |  | <b>7</b>  |           |          |
| Atom    |  | X         | Y         | Z        |
| Ag      |  | 12.975922 | -3.529879 | 5.240655 |
| Ag      |  | 15.341629 | -2.655083 | 6.703985 |
| Fe      |  | 13.588880 | -1.110604 | 5.709548 |
| P       |  | 12.396904 | -5.797750 | 4.792789 |
| P       |  | 16.986971 | -4.112234 | 7.628838 |
| C       |  | 12.173646 | -0.455039 | 4.871946 |
| O       |  | 11.253234 | 0.001107  | 4.326438 |
| C       |  | 14.424615 | 0.346628  | 6.267656 |
| O       |  | 14.948532 | 1.323268  | 6.620720 |
| C       |  | 14.595499 | -1.501641 | 4.283079 |
| O       |  | 15.244909 | -1.694169 | 3.329274 |
| C       |  | 12.807459 | -1.603909 | 7.241400 |
| O       |  | 12.276892 | -1.865203 | 8.250356 |
| H       |  | 18.343431 | -3.726449 | 7.792853 |
| H       |  | 17.243290 | -5.359213 | 6.998984 |
| H       |  | 16.797042 | -4.625788 | 8.938615 |
| H       |  | 12.999674 | -6.471738 | 3.697893 |
| H       |  | 11.060655 | -6.195378 | 4.522275 |
| H       |  | 12.668954 | -6.792168 | 5.769956 |
| Complex |  | <b>8</b>  |           |          |
| Atom    |  | X         | Y         | Z        |
| Ag      |  | 13.117665 | -3.919659 | 5.152924 |
| Ag      |  | 14.621668 | 0.831248  | 5.990937 |
| Fe      |  | 13.827976 | -1.539645 | 5.615387 |
| P       |  | 12.486169 | -6.161186 | 4.739823 |
| P       |  | 15.384189 | 3.050585  | 6.305396 |
| C       |  | 12.411397 | -0.476205 | 5.831616 |
| O       |  | 11.429520 | 0.146980  | 5.969133 |
| C       |  | 15.613405 | -1.514099 | 5.631094 |
| O       |  | 16.782191 | -1.587429 | 5.633344 |
| C       |  | 13.627219 | -1.770731 | 3.855778 |
| O       |  | 13.513806 | -1.832184 | 2.691513 |
| C       |  | 13.626051 | -2.393935 | 7.168922 |
| O       |  | 13.505656 | -2.877213 | 8.228518 |
| H       |  | 14.592639 | 4.138157  | 5.854595 |
| H       |  | 16.605488 | 3.461249  | 5.711809 |
| H       |  | 15.644207 | 3.549709  | 7.608060 |
| H       |  | 12.953493 | -6.826391 | 3.577333 |
| H       |  | 11.116230 | -6.504849 | 4.600738 |
| H       |  | 12.827262 | -7.172460 | 5.674390 |
| Complex |  | <b>9</b>  |           |          |
| Atom    |  | X         | Y         | Z        |
| Cu      |  | 12.997194 | -3.640712 | 5.311106 |



|    |           |           |           |
|----|-----------|-----------|-----------|
| Cu | 15.166592 | -3.105025 | 6.670461  |
| Fe | 13.590377 | -1.498159 | 6.011113  |
| P  | 12.645043 | -5.716308 | 4.842026  |
| P  | 16.720750 | -4.317784 | 7.545837  |
| C  | 12.202434 | -0.789780 | 5.164304  |
| O  | 11.291635 | -0.320074 | 4.610951  |
| C  | 14.373069 | -0.076573 | 6.729184  |
| O  | 14.890547 | 0.852577  | 7.202015  |
| C  | 14.722939 | -1.925305 | 4.709521  |
| O  | 15.470704 | -2.157504 | 3.823727  |
| C  | 12.884281 | -2.272199 | 7.442616  |
| O  | 12.415427 | -2.762390 | 8.405271  |
| C  | 18.262373 | -3.370207 | 7.792297  |
| C  | 18.715082 | -2.599145 | 6.710344  |
| C  | 19.909396 | -1.889711 | 6.811674  |
| C  | 20.650397 | -1.932352 | 7.996366  |
| C  | 20.193104 | -2.684546 | 9.079541  |
| C  | 19.000339 | -3.404173 | 8.981134  |
| C  | 17.299431 | -5.789724 | 6.637451  |
| C  | 18.530443 | -6.409358 | 6.904158  |
| C  | 18.910844 | -7.535742 | 6.176277  |
| C  | 18.078280 | -8.038098 | 5.169793  |
| C  | 16.866539 | -7.408087 | 4.885355  |
| C  | 16.482171 | -6.286767 | 5.618749  |
| C  | 16.261756 | -4.894598 | 9.214688  |
| C  | 16.703700 | -6.103738 | 9.764217  |
| C  | 16.296705 | -6.476340 | 11.045882 |
| C  | 15.445488 | -5.648463 | 11.781339 |
| C  | 14.998383 | -4.442995 | 11.233386 |
| C  | 15.402418 | -4.067596 | 9.953639  |
| C  | 13.578015 | -6.299055 | 3.382031  |
| C  | 14.628200 | -5.504358 | 2.900480  |
| C  | 15.395740 | -5.938907 | 1.819551  |
| C  | 15.114594 | -7.162450 | 1.209097  |
| C  | 14.052501 | -7.946826 | 1.669428  |
| C  | 13.280983 | -7.515285 | 2.747843  |
| C  | 10.945867 | -6.288626 | 4.502166  |
| C  | 10.244958 | -5.652949 | 3.464918  |
| C  | 8.945039  | -6.045759 | 3.158005  |
| C  | 8.328906  | -7.063734 | 3.892804  |
| C  | 9.018301  | -7.687040 | 4.933310  |
| C  | 10.325730 | -7.303304 | 5.240060  |
| C  | 13.214452 | -6.748724 | 6.240024  |
| C  | 13.688983 | -8.057246 | 6.083630  |
| C  | 14.144788 | -8.771827 | 7.191027  |
| C  | 14.122154 | -8.187808 | 8.459195  |

|                |           |           |           |
|----------------|-----------|-----------|-----------|
| C              | 13.640821 | -6.888027 | 8.622252  |
| C              | 13.196009 | -6.165046 | 7.516780  |
| H              | 18.126102 | -2.554755 | 5.792273  |
| H              | 20.257162 | -1.292792 | 5.968777  |
| H              | 21.580868 | -1.370429 | 8.076920  |
| H              | 20.764704 | -2.710368 | 10.007419 |
| H              | 18.640949 | -3.987378 | 9.828696  |
| H              | 19.194825 | -5.998638 | 7.664911  |
| H              | 19.866044 | -8.017875 | 6.385168  |
| H              | 18.386042 | -8.913827 | 4.598142  |
| H              | 16.222841 | -7.776755 | 4.087160  |
| H              | 15.545581 | -5.778270 | 5.402170  |
| H              | 17.346123 | -6.764326 | 9.183462  |
| H              | 16.640007 | -7.420566 | 11.469029 |
| H              | 15.123858 | -5.945617 | 12.779638 |
| H              | 14.323578 | -3.798650 | 11.796031 |
| H              | 15.034401 | -3.138845 | 9.514368  |
| H              | 14.843927 | -4.541890 | 3.367108  |
| H              | 16.210563 | -5.314951 | 1.453893  |
| H              | 15.713651 | -7.500650 | 0.363513  |
| H              | 13.819557 | -8.893146 | 1.180882  |
| H              | 12.435195 | -8.113002 | 3.088934  |
| H              | 10.722244 | -4.849755 | 2.900956  |
| H              | 8.406974  | -5.550990 | 2.349568  |
| H              | 7.308581  | -7.365150 | 3.656395  |
| H              | 8.538680  | -8.476725 | 5.511830  |
| H              | 10.863127 | -7.790485 | 6.052798  |
| H              | 13.727643 | -8.510281 | 5.094149  |
| H              | 14.528730 | -9.783521 | 7.060237  |
| H              | 14.489949 | -8.741926 | 9.322440  |
| H              | 13.631886 | -6.424468 | 9.607567  |
| H              | 12.842396 | -5.141049 | 7.645447  |
| <b>Complex</b> |           | <b>10</b> |           |
| Atom           | X         | Y         | Z         |
| Cu             | 13.070613 | -3.436437 | 5.308810  |
| Cu             | 15.205176 | -2.671514 | 6.588346  |
| Fe             | 13.619146 | -1.212011 | 5.714346  |
| P              | 12.596098 | -5.514013 | 4.995643  |
| P              | 16.671848 | -4.033150 | 7.382041  |
| C              | 12.219364 | -0.550888 | 4.841977  |
| O              | 11.304532 | -0.115753 | 4.272169  |
| C              | 14.425029 | 0.252268  | 6.316789  |
| O              | 14.947872 | 1.214063  | 6.707263  |
| C              | 14.679203 | -1.678514 | 4.359141  |
| O              | 15.370339 | -1.949853 | 3.451456  |
| C              | 12.858551 | -1.826902 | 7.204695  |

|                |           |           |          |
|----------------|-----------|-----------|----------|
| O              | 12.343808 | -2.193088 | 8.192506 |
| H              | 18.027292 | -3.647010 | 7.560397 |
| H              | 16.925899 | -5.257522 | 6.706176 |
| H              | 16.470964 | -4.585156 | 8.675113 |
| H              | 13.358571 | -6.263582 | 4.059994 |
| H              | 11.312052 | -5.942183 | 4.562252 |
| H              | 12.721783 | -6.413996 | 6.088147 |
| <b>Complex</b> |           | <b>11</b> |          |
| Atom           | X         | Y         | Z        |
| Cu             | 13.214907 | -3.724144 | 5.209928 |
| Cu             | 14.530582 | 0.637020  | 5.927422 |
| Fe             | 13.725513 | -1.524482 | 5.716539 |
| P              | 12.765637 | -5.772958 | 4.757874 |
| P              | 15.308995 | 2.632387  | 6.072309 |
| C              | 12.455489 | -0.308331 | 5.995478 |
| O              | 11.558521 | 0.427559  | 6.173070 |
| C              | 15.499072 | -1.402926 | 5.840648 |
| O              | 16.671479 | -1.414786 | 5.913590 |
| C              | 13.477517 | -1.836326 | 3.979462 |
| O              | 13.333765 | -1.955708 | 2.819904 |
| C              | 13.392968 | -2.542490 | 7.139335 |
| O              | 13.193517 | -3.138438 | 8.130832 |
| H              | 14.482769 | 3.732236  | 5.726552 |
| H              | 16.439782 | 2.990495  | 5.294325 |
| H              | 15.774396 | 3.130694  | 7.317265 |
| H              | 13.271476 | -6.350612 | 3.564350 |
| H              | 11.414722 | -6.183837 | 4.607424 |
| H              | 13.175127 | -6.793413 | 5.655002 |
